# Supplementary material for: Spontaneous chiral resolution of a rare 3D self-penetration coordination polymer for sensitive aqueous-phase detection of picric acid
Source: Royal Society of Chemistry journal article supplement (doi:10.1039/c5dt03218k), 2015-01-01
Supplement: c5dt03218k1.pdf [file c5dt03218k1.pdf]

## Supporting information

### **Spontaneous chiral resolution of a rare 3D self-penetration coordination polymer for sensitive aqueous-phase detection of picric acid**

**Bai-Qiao Song, Chao Qin\*, Yu-Teng Zhang, Xue-Song Wu, Liu Yang, Kui-Zhan Shao and  
Zhong-Min Su\***

Institute of Functional Material Chemistry; Key Laboratory of Polyoxometalate  
Science of Ministry of Education, Northeast Normal University, Changchun, 130024  
Jilin, People's Republic of China; E-mail: [qinc703@nenu.edu.cn](mailto:qinc703@nenu.edu.cn),  
[zmsu@nenu.edu.cn](mailto:zmsu@nenu.edu.cn)

**Table S1.** Selected bond lengths (Å) and bond angles (°).

| Bond lengths (Å)    |            |                    |            |
|---------------------|------------|--------------------|------------|
| <b>1R</b>           |            | <b>1L</b>          |            |
| Cd(1)-O(3)          | 2.225(3)   | N(1)-Cd(1)         | 2.281(3)   |
| Cd(1)-N(7)          | 2.285(3)   | N(3)-Cd(1)#5       | 2.402(3)   |
| Cd(1)-O(2)#1        | 2.350(3)   | N(5)-Cd(1)         | 2.410(3)   |
| Cd(1)-N(6)#2        | 2.396(3)   | O(1)-Cd(1)         | 2.223(3)   |
| Cd(1)-O(1)#1        | 2.503(3)   | O(3)-Cd(1)         | 2.355(3)   |
| Cd(1)-N(1)          | 2.407(3)   | O(4)-Cd(1)         | 2.505(3)   |
| N(6)-Cd(1)#6        | 2.396(3)   | Cd(1)-N(3)#6       | 2.402(3)   |
| Bond angles (°)     |            |                    |            |
| <b>1R</b>           |            | <b>1L</b>          |            |
| O(3)-Cd(1)-N(7)     | 118.82(11) | C(1)-N(1)-Cd(1)    | 126.5(2)   |
| O(3)-Cd(1)-O(2)#1   | 95.36(10)  | C(2)-N(1)-Cd(1)    | 127.9(2)   |
| N(7)-Cd(1)-O(2)#1   | 101.82(10) | C(18)-N(3)-Cd(1)#5 | 123.2(2)   |
| O(3)-Cd(1)-N(6)#2   | 80.55(10)  | C(19)-N(3)-Cd(1)#5 | 124.8(2)   |
| N(7)-Cd(1)-N(6)#2   | 157.55(10) | C(11)-N(5)-Cd(1)   | 133.1(2)   |
| O(2)#1-Cd(1)-N(6)#2 | 86.41(10)  | N(6)-N(5)-Cd(1)    | 118.49(19) |
| O(3)-Cd(1)-N(1)     | 100.12(10) | C(21)-O(1)-Cd(1)   | 112.4(2)   |
| N(7)-Cd(1)-N(1)     | 87.78(9)   | C(22)-O(3)-Cd(1)   | 93.4(2)    |
| O(2)#1-Cd(1)-N(1)   | 155.01(10) | C(22)-O(4)-Cd(1)   | 86.8(2)    |
| N(6)#2-Cd(1)-N(1)   | 77.00(9)   | O(1)-Cd(1)-N(1)    | 118.68(11) |
| O(3)-Cd(1)-O(1)#1   | 143.12(9)  | O(1)-Cd(1)-O(3)    | 95.32(10)  |
| N(7)-Cd(1)-O(1)#1   | 89.78(9)   | N(1)-Cd(1)-O(3)    | 101.83(10) |
| O(2)#1-Cd(1)-O(1)#1 | 53.65(9)   | O(1)-Cd(1)-N(3)#6  | 80.50(10)  |
| N(6)#2-Cd(1)-O(1)#1 | 78.26(9)   | N(1)-Cd(1)-N(3)#6  | 157.67(10) |
| N(1)-Cd(1)-O(1)#1   | 104.03(9)  | O(3)-Cd(1)-N(3)#6  | 86.55(10)  |
| C(1)-N(1)-Cd(1)     | 133.3(2)   | O(1)-Cd(1)-N(5)    | 100.06(11) |
| N(2)-N(1)-Cd(1)     | 118.6(2)   | N(1)-Cd(1)-N(5)    | 87.86(10)  |
| C(10)-N(6)-Cd(1)#6  | 123.3(2)   | O(3)-Cd(1)-N(5)    | 155.08(11) |
| C(11)-N(6)-Cd(1)#6  | 125.0(2)   | N(3)#6-Cd(1)-N(5)  | 76.89(9)   |
| C(12)-N(7)-Cd(1)    | 126.1(2)   | O(1)-Cd(1)-O(4)    | 143.02(10) |
| C(13)-N(7)-Cd(1)    | 127.8(2)   | N(1)-Cd(1)-O(4)    | 90.06(9)   |
| C(22)-O(1)-Cd(1)#5  | 86.7(2)    | O(3)-Cd(1)-O(4)    | 53.70(10)  |
| C(22)-O(2)-Cd(1)#5  | 93.7(2)    | N(3)#6-Cd(1)-O(4)  | 78.18(9)   |
| C(21)-O(3)-Cd(1)    | 112.0(3)   | N(5)-Cd(1)-O(4)    | 104.03(10) |

Symmetry transformations used to generate equivalent atoms: **1R**: #1 -y+1,x+1,z+1/4; #2 -y,x,z+1/4; #3 -y,x-1,z+1/4; #4 y+1,-x,z-1/4; #5 y-1,-x+1,z-1/4; #6 y,-x,z-1/4; **1L**: #1 -y+1,x-1,z-1/4; #2 y+1,-x+1,z+1/4; #3 y-1,-x,z+1/4; #4 -y,x+1,z-1/4; #5 -y+1,x,z-1/4; #6 y,-x+1,z+1/4;

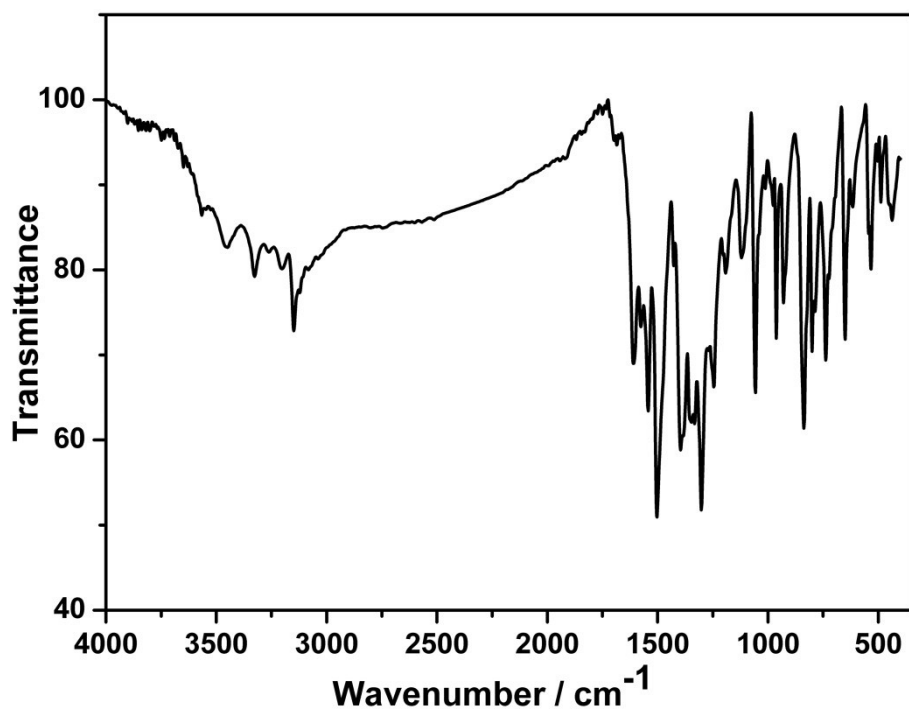

Figure S1. Infrared spectrum of fresh 1.

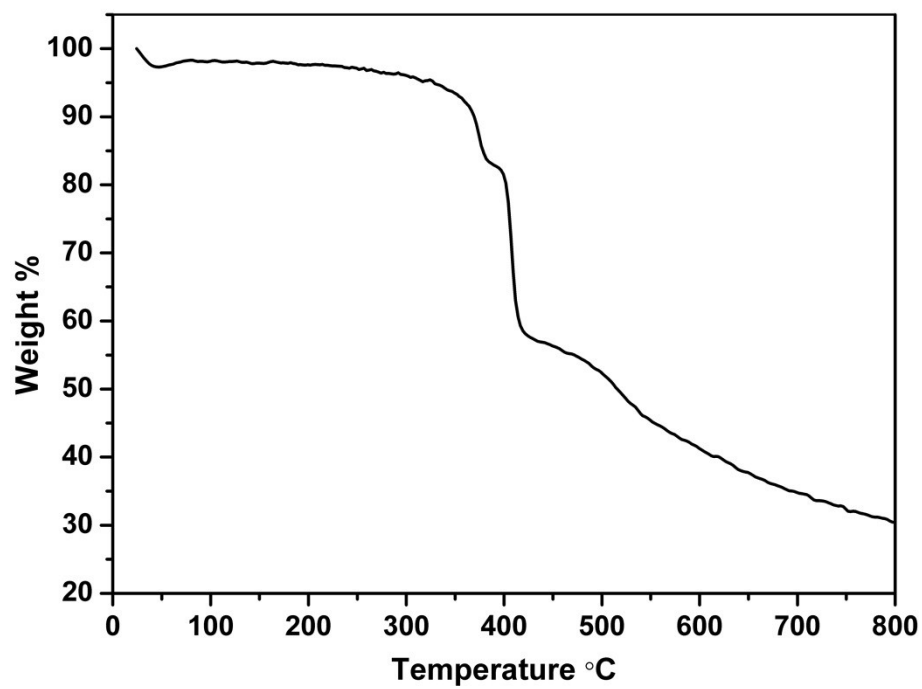

Figure S2. TGA curve of compound 1.

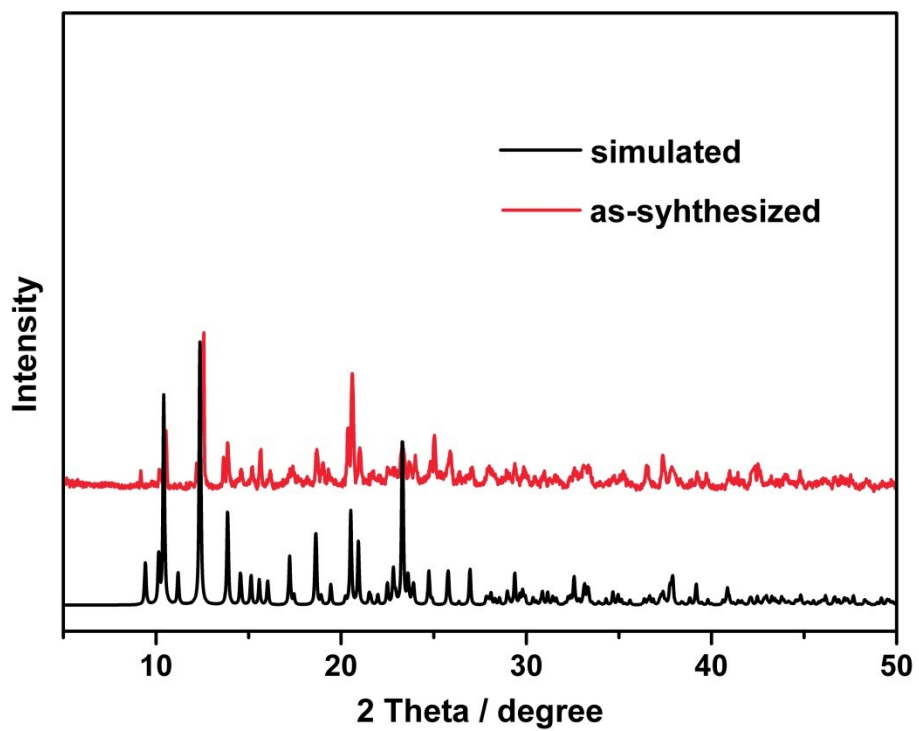

**Figure S3.** PXRD profiles of as-synthesized **1** and the simulated one.

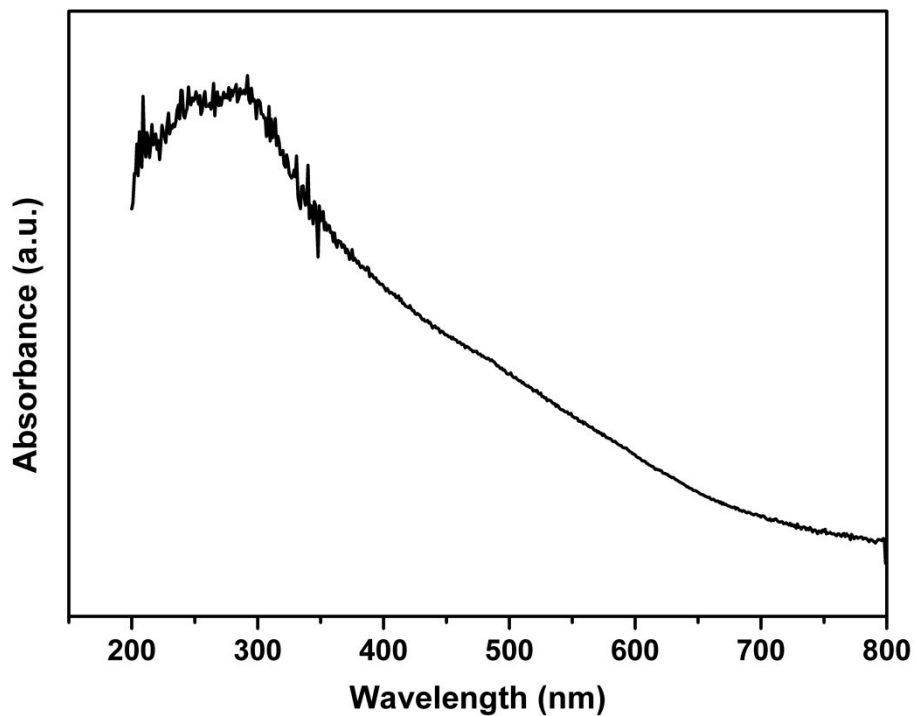

**Figure S4.** The UV-vis spectrum of the crystal of compound **1**.

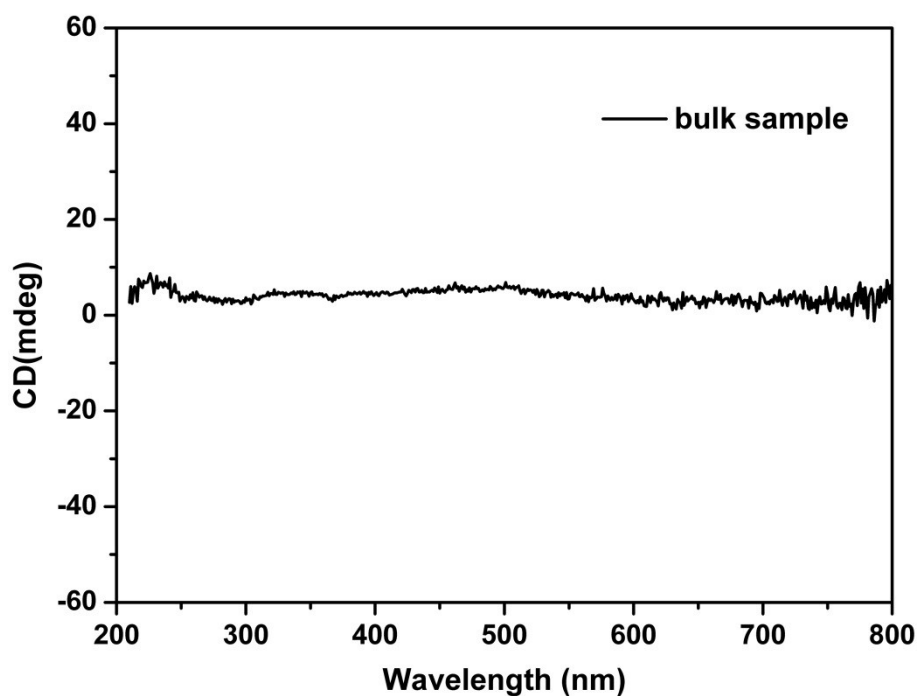

**Figure S5.** Solid-state CD spectrum of compound **1** (bulk sample). Note: because of the small size and the same appearances of the enantiomers **1R** and **1L**, it is difficult to separate them from one pot synthesis by hand. Therefore, no attempt to get the solid-state circular dichroism spectrum of pure enantiomer **1R** or **1L** was tried. The solid-state circular dichroism (CD) spectra obtained from KCl pellets using all crystals from a single batch proves that overall the expected racemic conglomerate is formed. These results confirm the single-crystal analysis, providing additional evidence for the asymmetric crystallization.

**Table S3.** A summary of structure determinations of 10 randomly selected crystals in the products of compound **1** from the same crystallization: the  $R$  factors and Flack absolute structure parameters for each refinement with the same  $P4_3$  space group.

|           | $a$      | $b$      | $c$       | $R_1$  | $wR_2$ | Flack parameter | Goodness-of-fit on $F^2$ |
|-----------|----------|----------|-----------|--------|--------|-----------------|--------------------------|
| <b>1</b>  | 8.704(5) | 8.704(5) | 37.500(5) | 0.0289 | 0.0865 | 0.01(3)         | 1.073                    |
| <b>2</b>  | 8.708(5) | 8.708(5) | 37.495(5) | 0.0319 | 0.0804 | 0.01(2)         | 1.011                    |
| <b>3</b>  | 8.704(5) | 8.704(5) | 37.498(5) | 0.0280 | 0.0715 | 0.03(4)         | 1.008                    |
| <b>4</b>  | 8.709(5) | 8.709(5) | 37.502(5) | 0.0254 | 0.0616 | -0.018(19)      | 1.018                    |
| <b>5</b>  | 8.710(5) | 8.710(5) | 37.511(5) | 0.0295 | 0.0599 | -0.01(2)        | 1.061                    |
| <b>6</b>  | 8.713(5) | 8.713(5) | 37.496(5) | 0.0497 | 0.0858 | 1.08(4)         | 1.004                    |
| <b>7</b>  | 8.717(5) | 8.717(5) | 37.505(5) | 0.0334 | 0.0704 | 1.00(2)         | 1.048                    |
| <b>8</b>  | 8.702(5) | 8.702(5) | 37.521(5) | 0.0341 | 0.0862 | 0.98(3)         | 1.021                    |
| <b>9</b>  | 8.720(5) | 8.720(5) | 37.493(5) | 0.0293 | 0.0680 | 0.98(2)         | 1.056                    |
| <b>10</b> | 8.704(5) | 8.704(5) | 37.495(5) | 0.0262 | 0.0619 | 1.05(4)         | 1.035                    |

In order to further ascertain the spontaneous resolution of this compound, 10 crystals chosen randomly were refined using single crystal X-ray diffraction data under the same space group  $P4_3$ . The Flack parameters of 5 crystals are close to zero, whereas those of the other 5 are close to one (Table S3, above). When the atomic coordinates of the latter 5 crystals are inverted, the Flack parameters are close to zero (Table S4, below). These results prove spontaneous resolution during the crystallization.

**Table S4.** A summary of structure determinations of crystals 6-10 with inverted space group  $P4_1$ .

|           | <i>a</i> | <i>b</i> | <i>c</i>  | $R_1$  | $wR_2$ | Flack parameter | Goodness-of-fit on $F^2$ |
|-----------|----------|----------|-----------|--------|--------|-----------------|--------------------------|
| <b>6</b>  | 8.713(5) | 8.713(5) | 37.496(5) | 0.0351 | 0.0764 | 0.002(14)       | 1.017                    |
| <b>7</b>  | 8.717(5) | 8.717(5) | 37.505(5) | 0.0297 | 0.0651 | -0.022(12)      | 1.066                    |
| <b>8</b>  | 8.702(5) | 8.702(5) | 37.521(5) | 0.0383 | 0.0952 | 0.015(32)       | 1.078                    |
| <b>9</b>  | 8.720(5) | 8.720(5) | 37.493(5) | 0.0369 | 0.0712 | 0.011(27)       | 1.092                    |
| <b>10</b> | 8.704(5) | 8.704(5) | 37.495(5) | 0.0232 | 0.0533 | -0.031(17)      | 1.046                    |

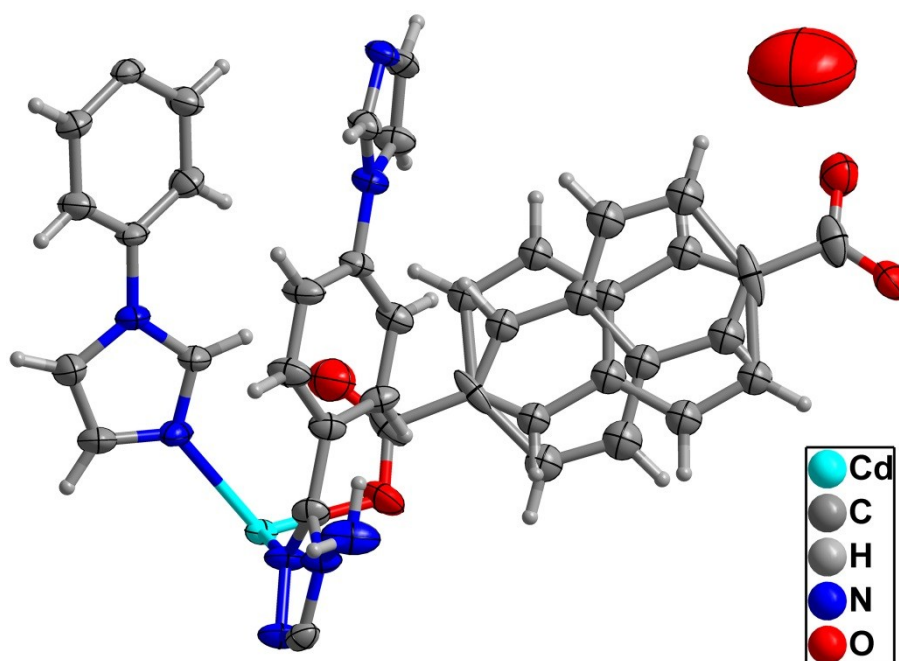

**Figure S6.** The asymmetric unit of **1R**, with thermal ellipsoids at 50% probability.

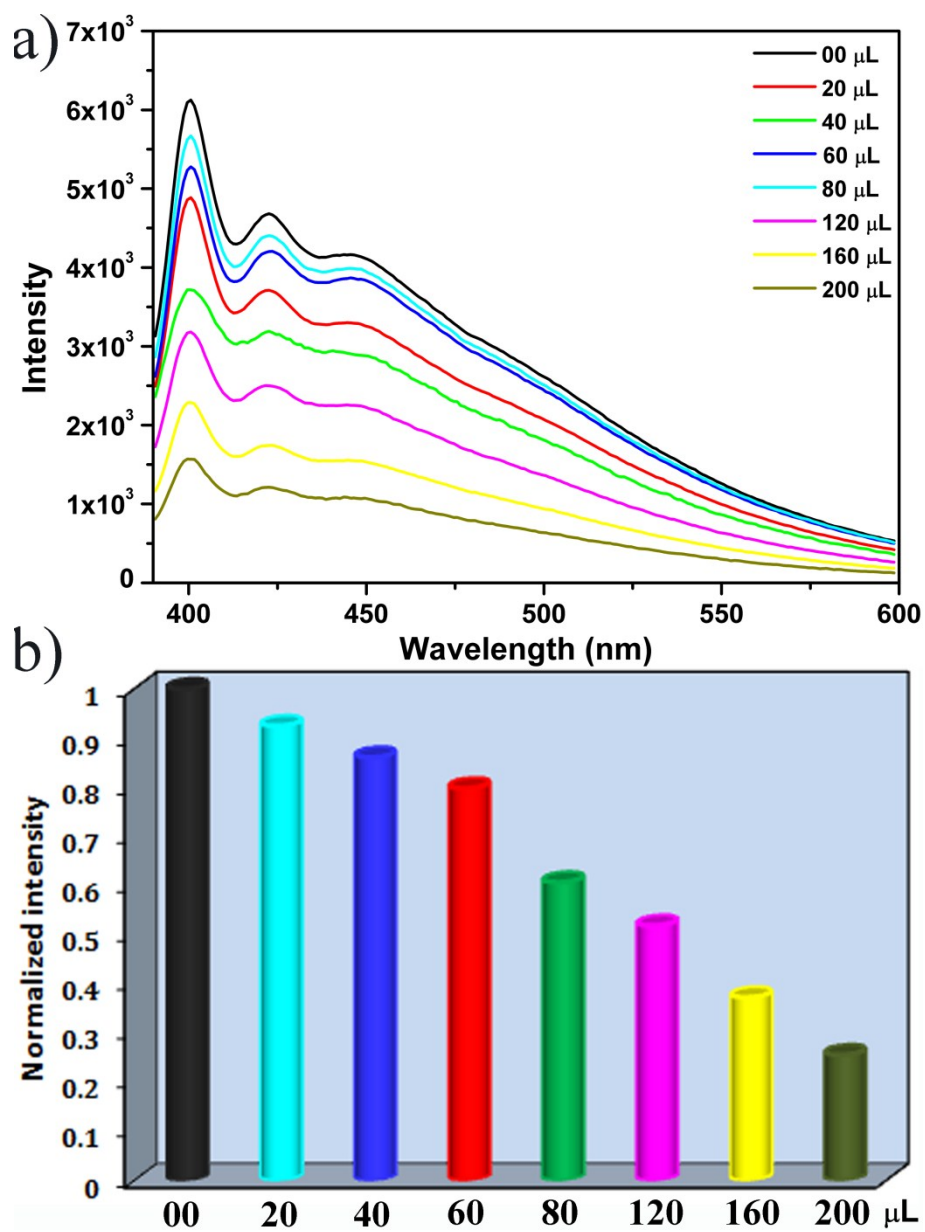

**Figure S7.** Emission spectra a) and fluorescent intensity changes b) of **1** dispersed in water upon incremental addition of a PA aqueous solution (excited at 370 nm).

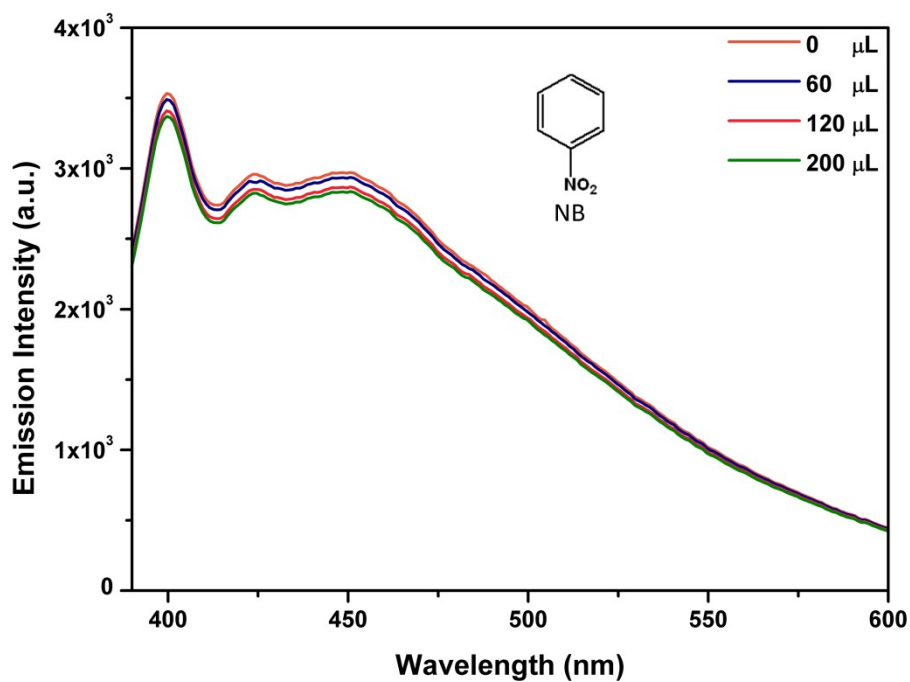

**Figure S8.** Emission spectra of **1** dispersed in water upon incremental addition of a NB aqueous solution (1 mM, excited at 370 nm).

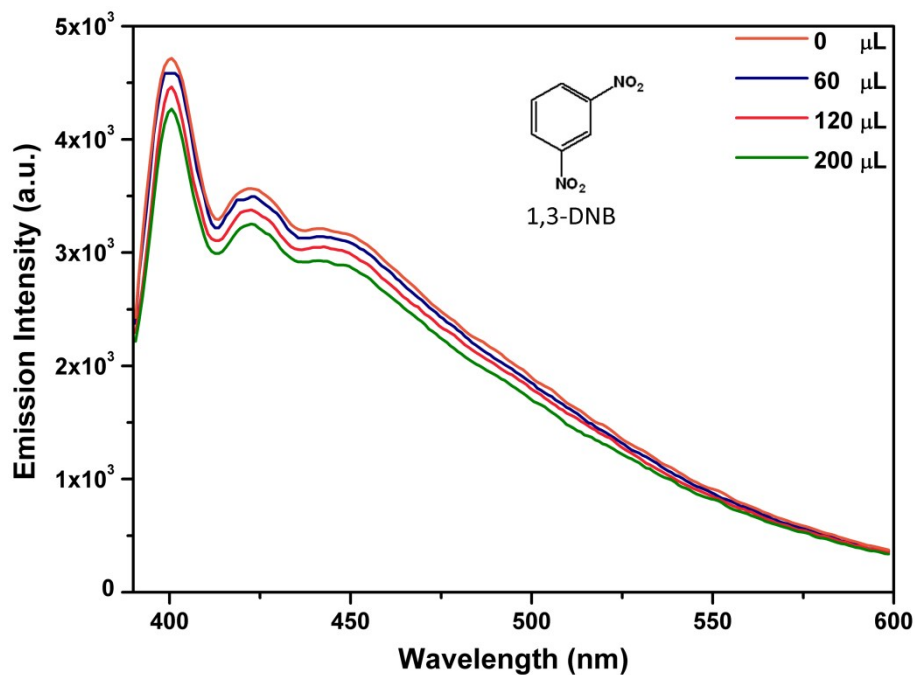

**Figure S9.** Emission spectra of **1** dispersed in water upon incremental addition of a 1,3-DNB aqueous solution (1 mM, excited at 370 nm).



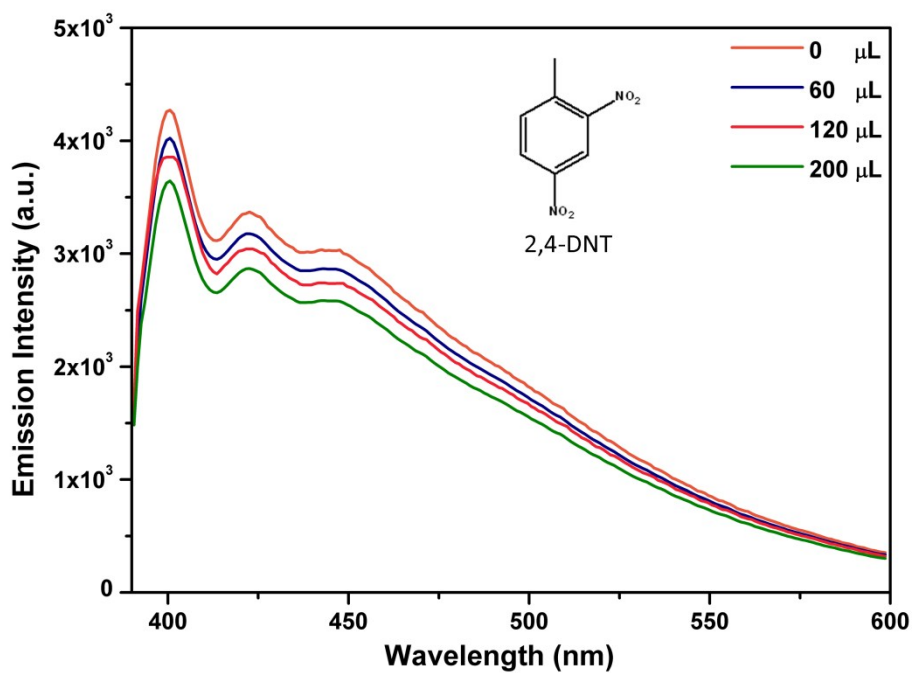

**Figure S10.** Emission spectra of **1** dispersed in water upon incremental addition of a 2,4-DNT aqueous solution (1mM, excited at 370 nm).

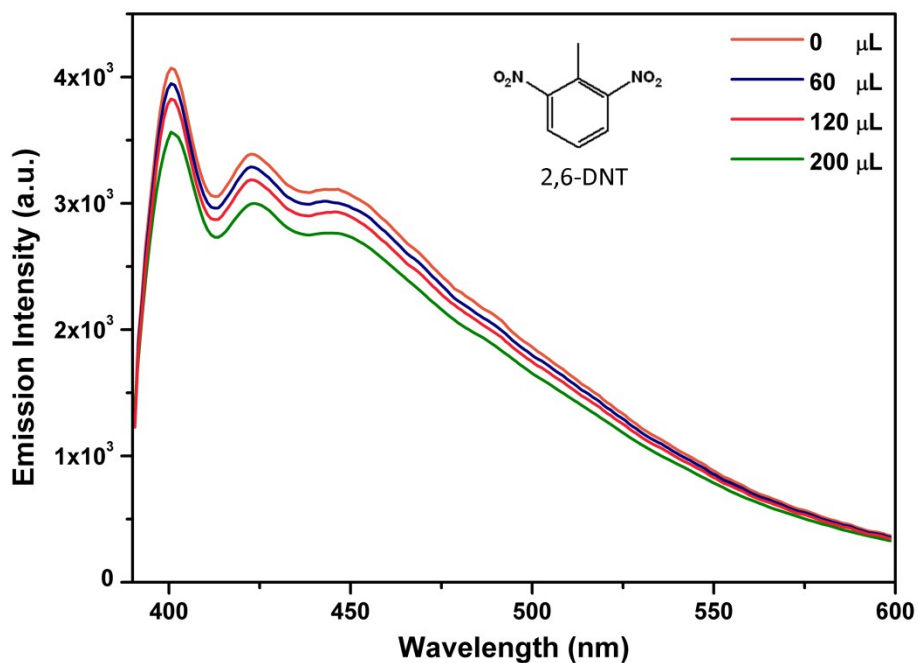

**Figure S11.** Emission spectra of **1** dispersed in water upon incremental addition of a 2,6-DNT aqueous solution (1mM, excited at 370 nm).

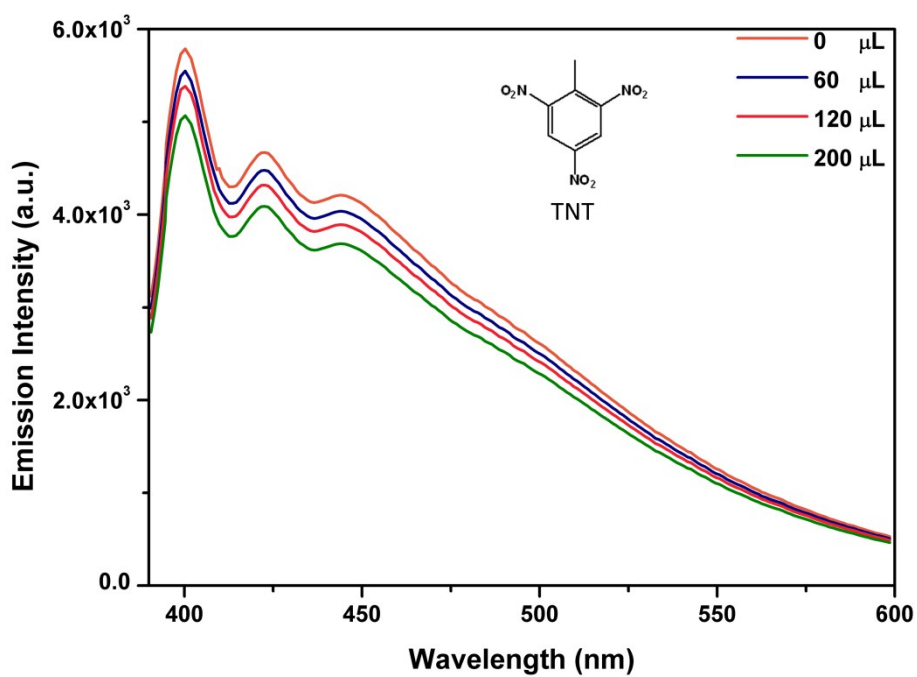

**Figure S11.** Emission spectra of **1** dispersed in water upon incremental addition of a TNT aqueous solution (1mM, excited at 370 nm).

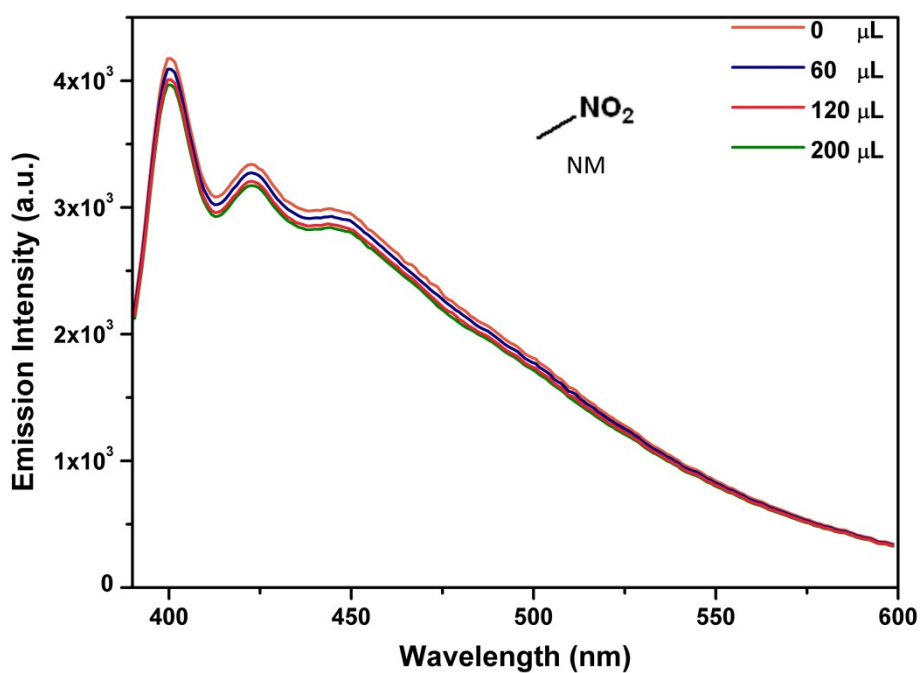

**Figure S12.** Emission spectra of **1** dispersed in water upon incremental addition of a NM aqueous solution (1mM, excited at 370 nm).

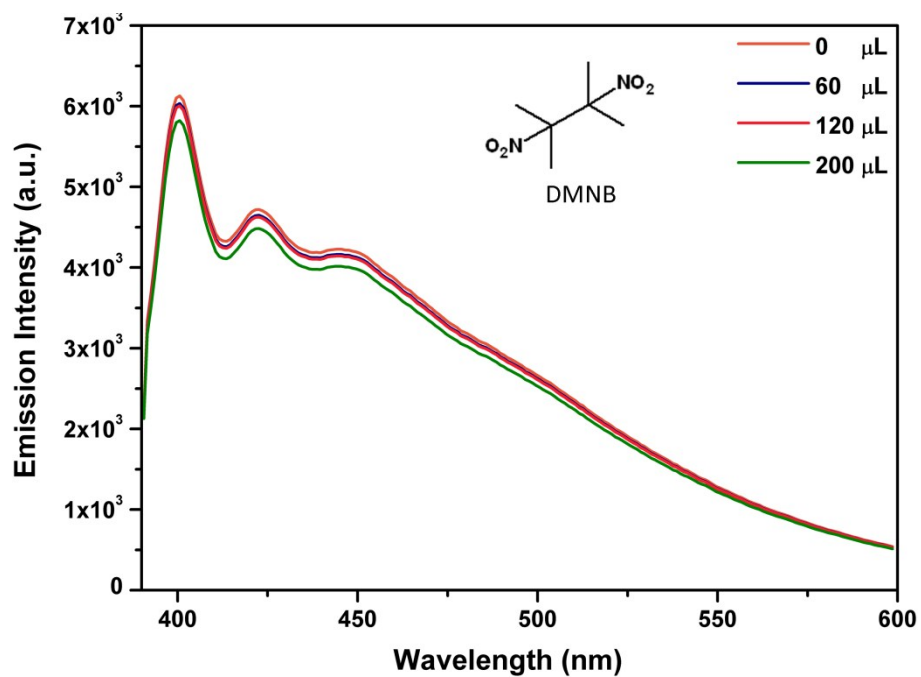

**Figure S13.** Emission spectra of **1** dispersed in water upon incremental addition of a DMNB aqueous solution (1 mM, excited at 370 nm).

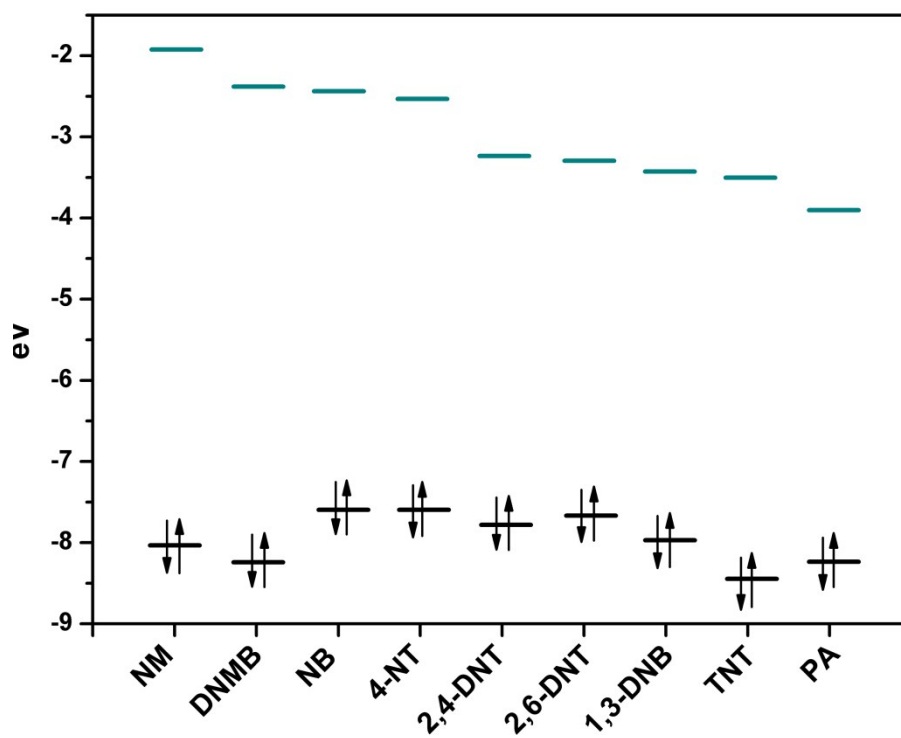

**Figure S14.** HOMO and LUMO energies of electron deficient nitro compounds.<sup>1</sup>

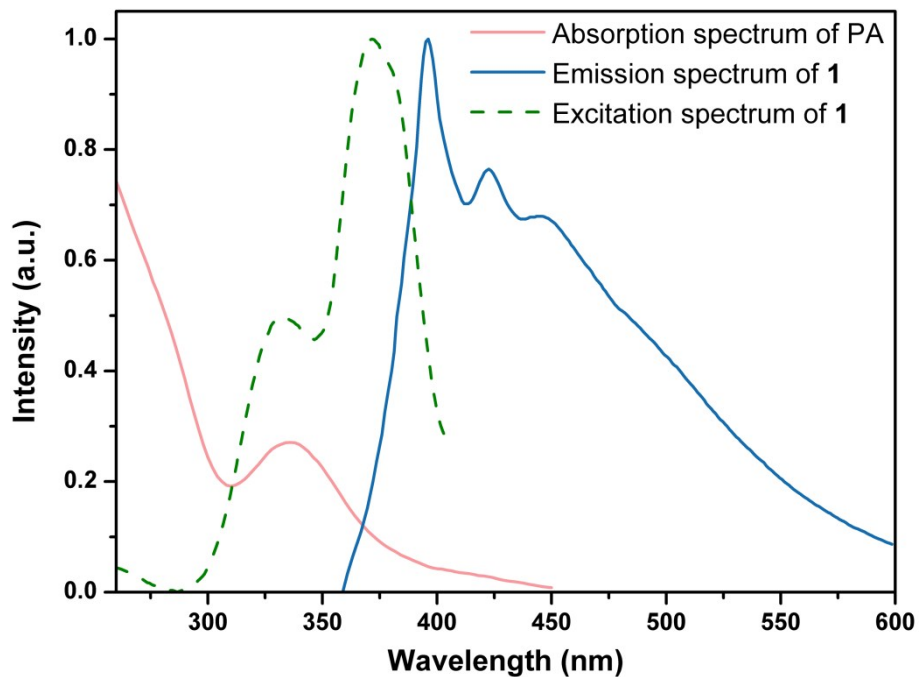

**Figure S15.** Spectral overlap between normalized absorbance spectra of PA and normalized emission / excitation spectra of **1** in water.

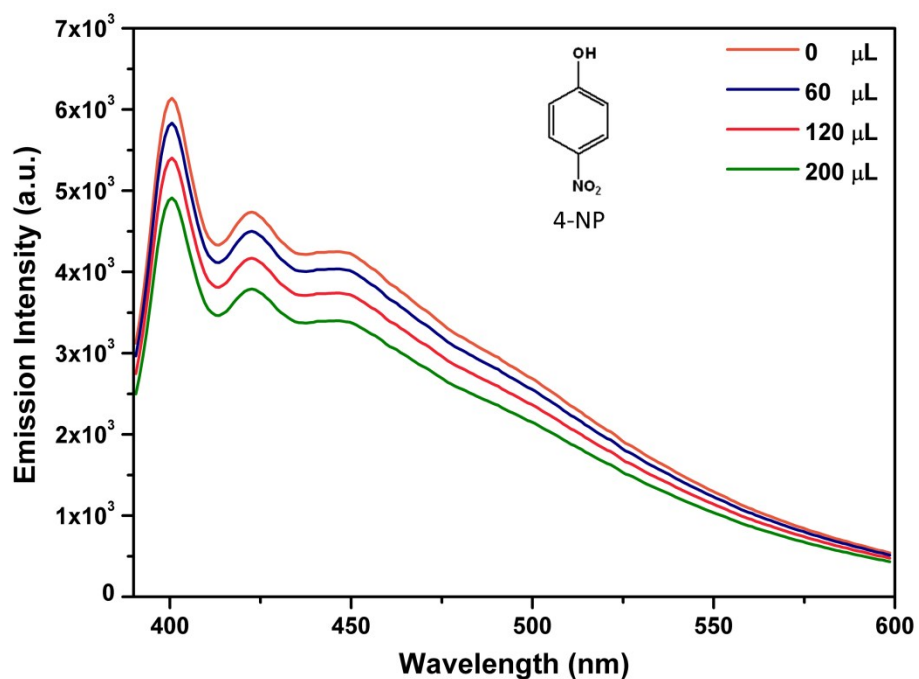

**Figure S16.** Emission spectra of **1** dispersed in water upon incremental addition of a 4-NP aqueous solution (1mM, excited at 370 nm).

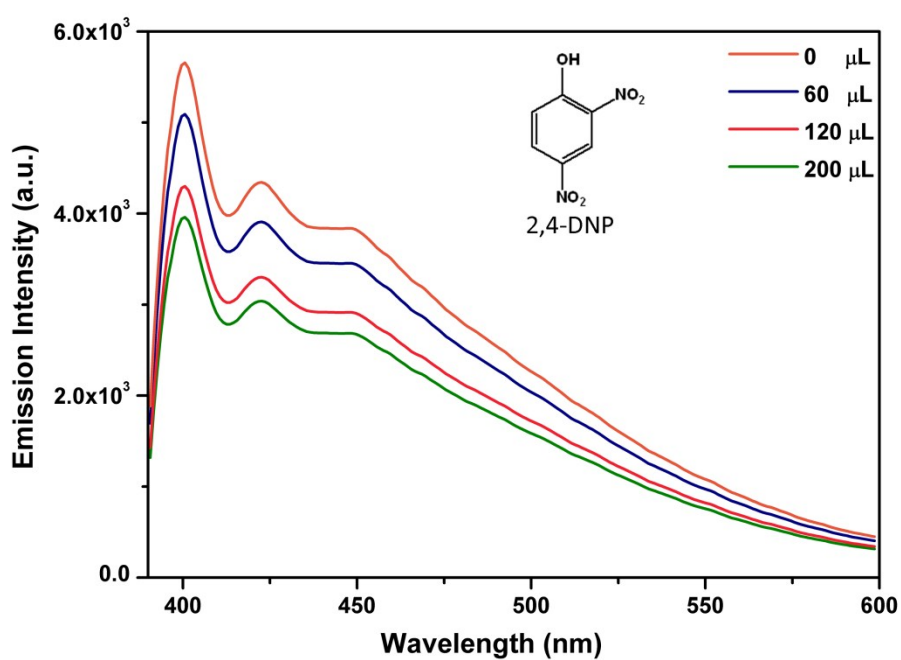

**Figure S17.** Emission spectra of **1** dispersed in water upon incremental addition of a 2,4-DNP aqueous solution (1mM, excited at 370 nm).

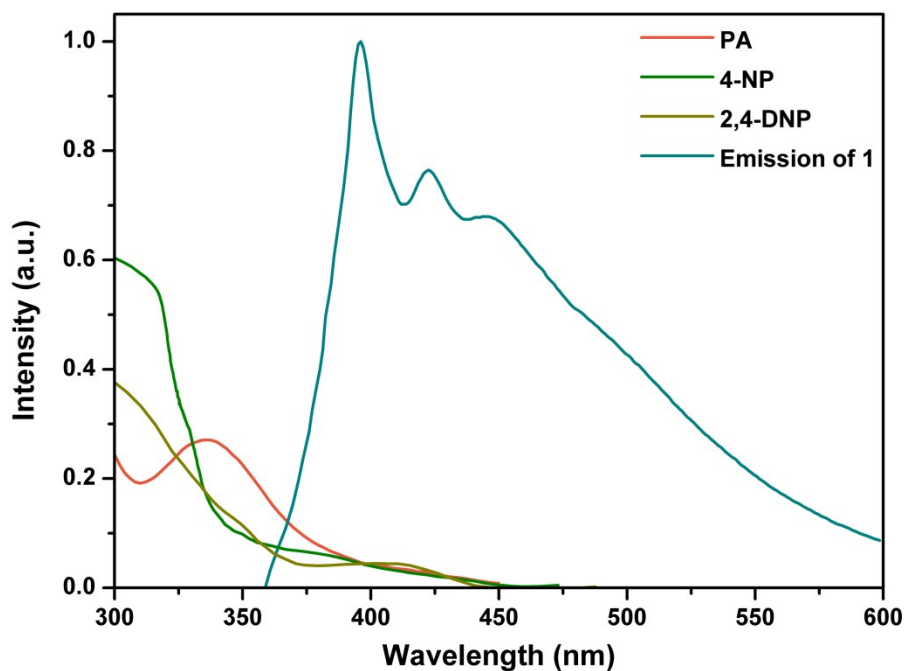

**Figure S18.** Spectral overlap between normalized absorbance spectra of 4-NP, 2,4-DNP and normalized emission spectra of **1** in water.

## References

- 1 (a) S. S. Nagarkar, B. Joarder, A. K. Chaudhari, S. Mukherjee and S. K. Ghosh, *Angew. Chem.*, 2013, **125**, 2953-2957; (b) S. Mukherjee, A. V. Desai, A. I. Inamdar, B. Manna and S. K. Ghosh, *Cryst. Growth Des.*, 2015; (c) Y. Peng, A.-J. Zhang, M. Dong and Y.-W. Wang, *Chem. Commun.*, 2011, **47**, 4505-4507; (d) M. E. Germain and M. J. Knapp, *Chem. Soc. Rev.*, 2009, **38**, 2543-2555; (e) S. S. Nagarkar, A. V. Desai and S. K. Ghosh, *Chem. Commun.*, 2014, **50**, 8915-8918; (f) B. Joarder, A. V. Desai, P. Samanta, S. Mukherjee and S. K. Ghosh, *Chem. – Eur. J.*, 2015, **21**, 965-969; (g) A. Lan, K. Li, H. Wu, D. H. Olson, T. J. Emge, W. Ki, M. Hong and J. Li, *Angew. Chem. Int. Ed.*, 2009, **48**, 2334-2338; (h) S. Pramanik, C. Zheng, X. Zhang, T. J. Emge and J. Li, *J. Am. Chem. Soc.*, 2011, **133**, 4153-4155; (i) X.-Z. Song, S.-Y. Song, S.-N. Zhao, Z.-M. Hao, M. Zhu, X. Meng, L.-L. Wu and H.-J. Zhang, *Adv. Funct. Mater.*, 2014, **24**, 4034-4041; (j) D. K. Singha and P. Mahata, *RSC Advances*, 2015, **5**, 28092-28097; (k) Z. Hu, B. J. Deibert and J. Li, *Chem. Soc. Rev.*, 2014, **43**, 5815-5840.
